# Supplementary material for: Bombardier beetles repel invasive bullfrogs
Source: PeerJ journal article supplement (doi:10.7717/peerj.13805), 2022-09-15
Supplement: Figure_S1.pdf [file Figure_S1.pdf]

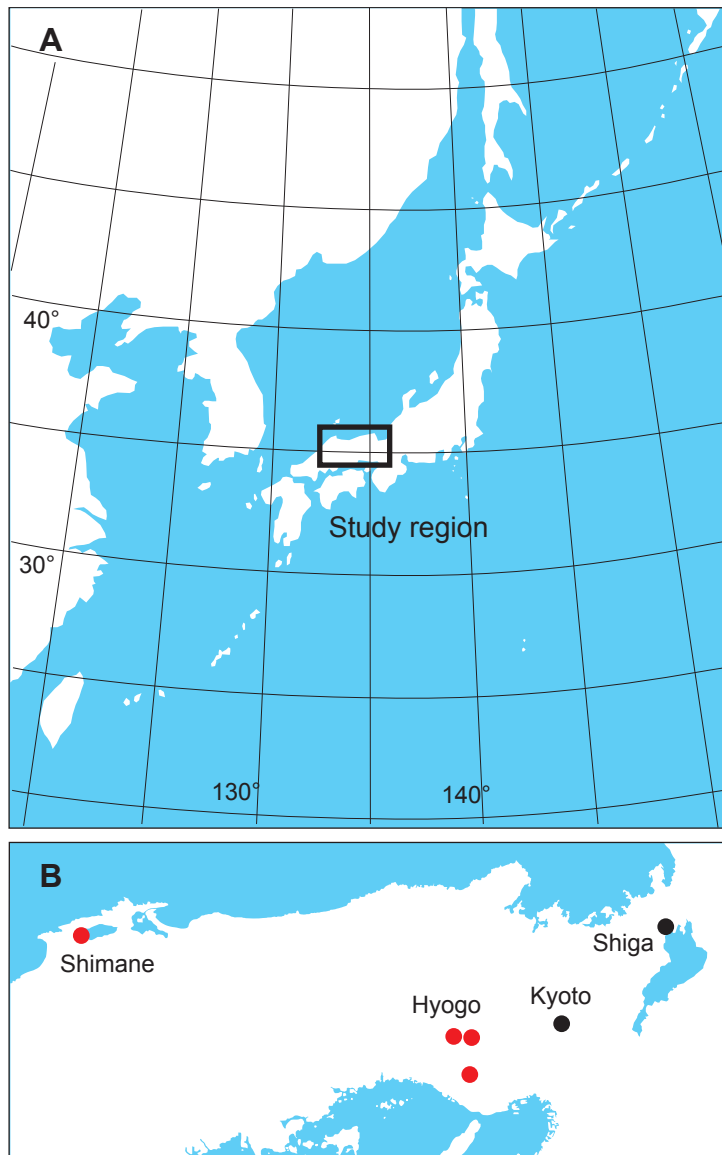

**Figure S1 Study region and sites.** (A) Study region (open rectangle). (B) Bullfrog-invaded (red circles,  $n = 4$ ) and non-invaded sites (black circles,  $n = 2$ ). White and blue areas represent land and sea (or lakes), respectively. The maps were modified from the Geospatial Information Authority of Japan (<http://maps.gsi.go.jp/>).
